# Supplementary material
Source: PubMed Central journal article supplement (PMC7814695)
Supplement: NIHMS1659316-supplement-Table_A__Supplementary_Correlations.pdf [file NIHMS1659316-supplement-Table_A__Supplementary_Correlations.pdf]

Table A. Correlational matrix of predictor and outcome variables.

| Variables | 1      | 2      | 3     | 4     | 5      | 6      | 7     |
|-----------|--------|--------|-------|-------|--------|--------|-------|
| 1. Age    | —      |        |       |       |        |        |       |
| 2. Income | -.12   | —      |       |       |        |        |       |
| 3. PVS    | -.21*  | .10    | —     |       |        |        |       |
| 4. ACE    | -.16   | .09    | .43** | —     |        |        |       |
| 5. FRI    | -.00   | .03    | .27** | -.22* | —      |        |       |
| 6. SSI    | .30**  | .01    | .25** | .26** | .36*   | —      |       |
| 7. GAD    | -.23** | -.24** | .33** | .37** | -.43** | -.43** | —     |
| 8. PHQ    | .16    | -.31** | .32** | .31** | -.38** | -.38** | .85** |

*Note.* PVS = Partner Victimization Scale; ACES = Adverse Childhood Experiences Scale; FRI = Family Resilience Index; SSI = Social Support Index; GAD = Generalized Anxiety symptoms; PHQ=Depression symptoms \* $p = .05$ ; \*\* $p = .01$
